# Supplementary material
Source: publisher figshare collection journal article supplement (https://gsapubs.figshare.com/articles/dataset/_/24112725)
Supplement: Supplementary file 1 [file 1]

## Sheet: Sheet1
Table S4
Cross section 2 - Southern Alberta/British Columbia (Price, 1981)
Km west of thrust front	1	2	3	4	5	6	7	8	9	10	11	12	13	14	15	16	17	18	19	20	21	22	23	24	25	26	27	28	29	30	31	32	33	34	35	36	37	38	39	40	41	42	43	44	45	46	47	48	49
Znet (km)	4	4	4	4	4	4	4	4	4	4	4	4	4	4	4	4	4	4	4	4	4	4	4	4	4	4	4	4	4	4	4	4	5	5	5	5	5	5	5	6	6	6	6	6	6	6	6	6	6
Ze (km)
Zfb (km)	4	4	4	4	4	4	4	4	4	4	4	4	4	4	4	4	4	4	4	4	4	4	4	4	4	4	4	4	4	4	4	4	4	4	4	4	3	2	1	1	1	1	1	1	1	1	2	2	2
Zthr (km)																																					1	2	3	3	3	3	3	3	3	3	2	2	2
Zu (km)																																	1	1	1	1	1	1	1	2	2	2	2	2	2	2	2	2	2
Cross section 6 - Central Utah (DeCelles and Coogan, 2006)
Km west of thrust front	1	2	3	4	5	6	7	8	9	10	11	12	13	14	15	16	17	18	19	20	21	22	23	24	25	26	27	28	29	30	31	32	33	34	35	36	37	38	39	40	41	42	43	44	45	46	47	48	49
Znet (km)	4	4	4	4	3	4	4	4	4	5	5	6	6	6	5	5	5	5	5	5	5	5	5	5	5	5	6	7	6	6	6	6	6	6	8	7	7	7	7	6	6	6	6	6	7	6	6	7	6
Ze (km)																																								1	1	1	1	6	5	5	5	4	4
Zfb (km)	4	4	4	4	3	3	3	2	2	3	3	2	3	3	3	3	3	3	4	4	4	4	4	4	4	4	3	2	1
Zthr (km)						1	1	2	2	2	2	4	3	3	-2	-2	-2	-2	-3	-3	-3	-3	-3	-3	-3	-3	-1	1	1	2	2	2	2	2	3	3	3	3	4	4	4	5	5	9	9	8	7	7	6
Zu (km)															4	4	4	4	4	4	4	4	4	4	4	4	4	4	4	4	4	4	4	4	5	4	4	4	3	3	3	2	2	3	3	3	4	4	4
[truncated: 279 more columns]
